# Supplementary material for: Revealing the effect of Nb or V doping on anode performance in Na2Ti3O7 for sodium-ion batteries: a first-principles study
Source: Royal Society of Chemistry journal article supplement (doi:10.1039/d3ra01755a), 2023-01-01
Supplement: d3ra01755a1.pdf [file d3ra01755a1.pdf]

# Supporting Information – Revealing the effect of Nb or V doping on anode performance in $\text{Na}_2\text{Ti}_3\text{O}_7$ for sodium-ion battery: A first-principles study

Suk-Gyong Hwang, Chung-Hyok Kim, Song-Hyok Choe, Kum-Chol Ri, Chol-Jun Yu\*

*Computational Materials Design (CMD), Faculty of Materials Science, Kim Il Sung University, Ryongnam-Dong, Taesong District, Pyongyang, PO Box 76, Democratic People's Republic of Korea*

---

\*Corresponding author: Chol-Jun Yu, Email: [cj.yu@ryongnamsan.edu.kp](mailto:cj.yu@ryongnamsan.edu.kp)

Table S1. Löwdin charge of atoms in  $\text{Na}_2\text{TiO}_3\text{O}_7$  (NTO-2),  $\text{Na}_4\text{Ti}_3\text{O}_7$  (NTO-4),  $\text{Na}_2\text{Ti}_{2.75}\text{Nb}_{0.25}\text{O}_7$  (NTNO-2),  $\text{Na}_4\text{Ti}_{2.75}\text{Nb}_{0.25}\text{O}_7$  (NTNO-4),  $\text{Na}_2\text{Ti}_{2.75}\text{V}_{0.25}\text{O}_7$  (NTVO-2) and  $\text{Na}_4\text{Ti}_{2.75}\text{V}_{0.25}\text{O}_7$  (NTVO-4).

| Atoms     | NTO-2   | NTO-4   | NTNO-2  | NTNO-4  | NTVO-2  | NTVO-4  |
|-----------|---------|---------|---------|---------|---------|---------|
| Na        | 0.7314  | 0.7015  | 0.7376  | 0.7415  | 0.7318  | 0.7004  |
| Na        | 0.7319  | 0.7124  | 0.7500  | 0.7452  | 0.7309  | 0.7127  |
| Na        | 0.7314  | 0.7016  | 0.7744  | 0.7453  | 0.7383  | 0.7043  |
| Na        | 0.7319  | 0.7124  | 0.7333  | 0.7136  | 0.7321  | 0.7128  |
| Na        | 0.7314  | 0.7016  | 0.7311  | 0.7019  | 0.7319  | 0.7025  |
| Na        | 0.7319  | 0.7124  | 0.7350  | 0.7137  | 0.7310  | 0.7130  |
| Na        | 0.7314  | 0.7016  | 0.7744  | 0.7453  | 0.7383  | 0.7042  |
| Na        | 0.7319  | 0.7124  | 0.7333  | 0.7136  | 0.7321  | 0.7128  |
| Ti        | 1.5185  | 1.2713  | 1.5156  | 1.3264  | 1.5137  | 1.3855  |
| Ti        | 1.4958  | 1.4807  | 1.4698  | 1.5326  | 1.4982  | 1.5927  |
| Ti        | 1.5184  | 1.2714  | 1.5508  | 1.3542  | 1.5197  | 1.3374  |
| Ti        | 1.4958  | 1.4804  | 1.5292  | 1.5069  | 1.4966  | 1.5358  |
| Ti        | 1.5674  | 1.2050  | 1.5446  | 1.2953  | 1.5673  | 1.2930  |
| Ti        | 1.5184  | 1.2706  | 1.4853  | 1.3281  | 1.5134  | 1.3275  |
| Ti        | 1.4958  | 1.4801  | 1.4555  | 1.5372  | 1.4978  | 1.4996  |
| Ti        | 1.5674  | 1.2035  | 1.3648  | 1.0839  | 1.5500  | 1.3643  |
| Ti        | 1.5185  | 1.2704  | 1.5508  | 1.3441  | 1.5197  | 1.3369  |
| Ti        | 1.4958  | 1.4804  | 1.5292  | 1.5021  | 1.4966  | 1.5352  |
| Ti        | 1.5674  | 1.2036  | 1.5446  | 1.2821  | 1.5673  | 1.2926  |
| Ti, Nb, V | 1.5674  | 1.2053  | 0.1288  | 0.0101  | 1.0556  | 0.2759  |
| O         | -0.7750 | -0.8936 | -0.5616 | -0.7551 | -0.7504 | -0.9228 |
| O         | -0.7757 | -0.8908 | -0.4980 | -0.6878 | -0.5784 | -0.9924 |
| O         | -0.7976 | -0.8437 | -0.7636 | -0.8362 | -0.7633 | -0.8457 |
| O         | -0.8195 | -0.8885 | -0.7827 | -0.8769 | -0.8085 | -0.8819 |
| O         | -0.8362 | -0.9175 | -0.8213 | -0.9104 | -0.8284 | -0.9168 |
| O         | -0.8387 | -0.9037 | -0.6982 | -0.7684 | -0.7892 | -0.9137 |
| O         | -0.8329 | -0.9089 | -0.7272 | -0.7940 | -0.8010 | -0.8974 |
| O         | -0.7750 | -0.8936 | -0.7595 | -0.8914 | -0.7705 | -0.8898 |
| O         | -0.7757 | -0.8908 | -0.7523 | -0.8852 | -0.7660 | -0.8892 |
| O         | -0.7976 | -0.8437 | -0.7529 | -0.8463 | -0.7945 | -0.8351 |
| O         | -0.8194 | -0.8885 | -0.8062 | -0.8854 | -0.8158 | -0.8846 |
| O         | -0.8362 | -0.9175 | -0.6529 | -0.7955 | -0.8103 | -0.9057 |
| O         | -0.8387 | -0.9037 | -0.8246 | -0.9005 | -0.8271 | -0.9002 |
| O         | -0.8329 | -0.9089 | -0.8169 | -0.9065 | -0.8290 | -0.9083 |
| O         | -0.7750 | -0.8936 | -0.7425 | -0.8984 | -0.7744 | -0.8917 |
| O         | -0.7757 | -0.8908 | -0.7583 | -0.8912 | -0.7674 | -0.8915 |
| O         | -0.7976 | -0.8437 | -0.7935 | -0.8392 | -0.7938 | -0.8399 |
| O         | -0.8194 | -0.8886 | -0.8157 | -0.8856 | -0.8154 | -0.8869 |
| O         | -0.8362 | -0.9175 | -0.8284 | -0.9154 | -0.8313 | -0.9114 |
| O         | -0.8387 | -0.9037 | -0.8241 | -0.9093 | -0.8378 | -0.8918 |
| O         | -0.8329 | -0.9089 | -0.8210 | -0.9051 | -0.8294 | -0.9029 |
| O         | -0.7750 | -0.8936 | -0.7595 | -0.8912 | -0.7705 | -0.8898 |
| O         | -0.7757 | -0.8908 | -0.7523 | -0.8851 | -0.7660 | -0.8897 |
| O         | -0.7976 | -0.8437 | -0.7529 | -0.8460 | -0.7945 | -0.8347 |
| O         | -0.8195 | -0.8886 | -0.8062 | -0.8854 | -0.8158 | -0.8845 |
| O         | -0.8362 | -0.9175 | -0.6529 | -0.7958 | -0.8103 | -0.9058 |
| O         | -0.8387 | -0.9037 | -0.8246 | -0.9006 | -0.8271 | -0.9004 |
| O         | -0.8329 | -0.9089 | -0.8169 | -0.9067 | -0.8290 | -0.9083 |
| Na        |         | 0.7111  |         | 0.7423  |         | 0.7131  |
| Na        |         | 0.7111  |         | 0.7423  |         | 0.7131  |
| Na        |         | 0.7249  |         | 0.7620  |         | 0.7265  |
| Na        |         | 0.7249  |         | 0.7262  |         | 0.7258  |
| Na        |         | 0.7249  |         | 0.7261  |         | 0.7254  |
| Na        |         | 0.7249  |         | 0.7261  |         | 0.7254  |
| Na        |         | 0.7111  |         | 0.7167  |         | 0.7110  |
| Na        |         | 0.7111  |         | 0.7120  |         | 0.7114  |

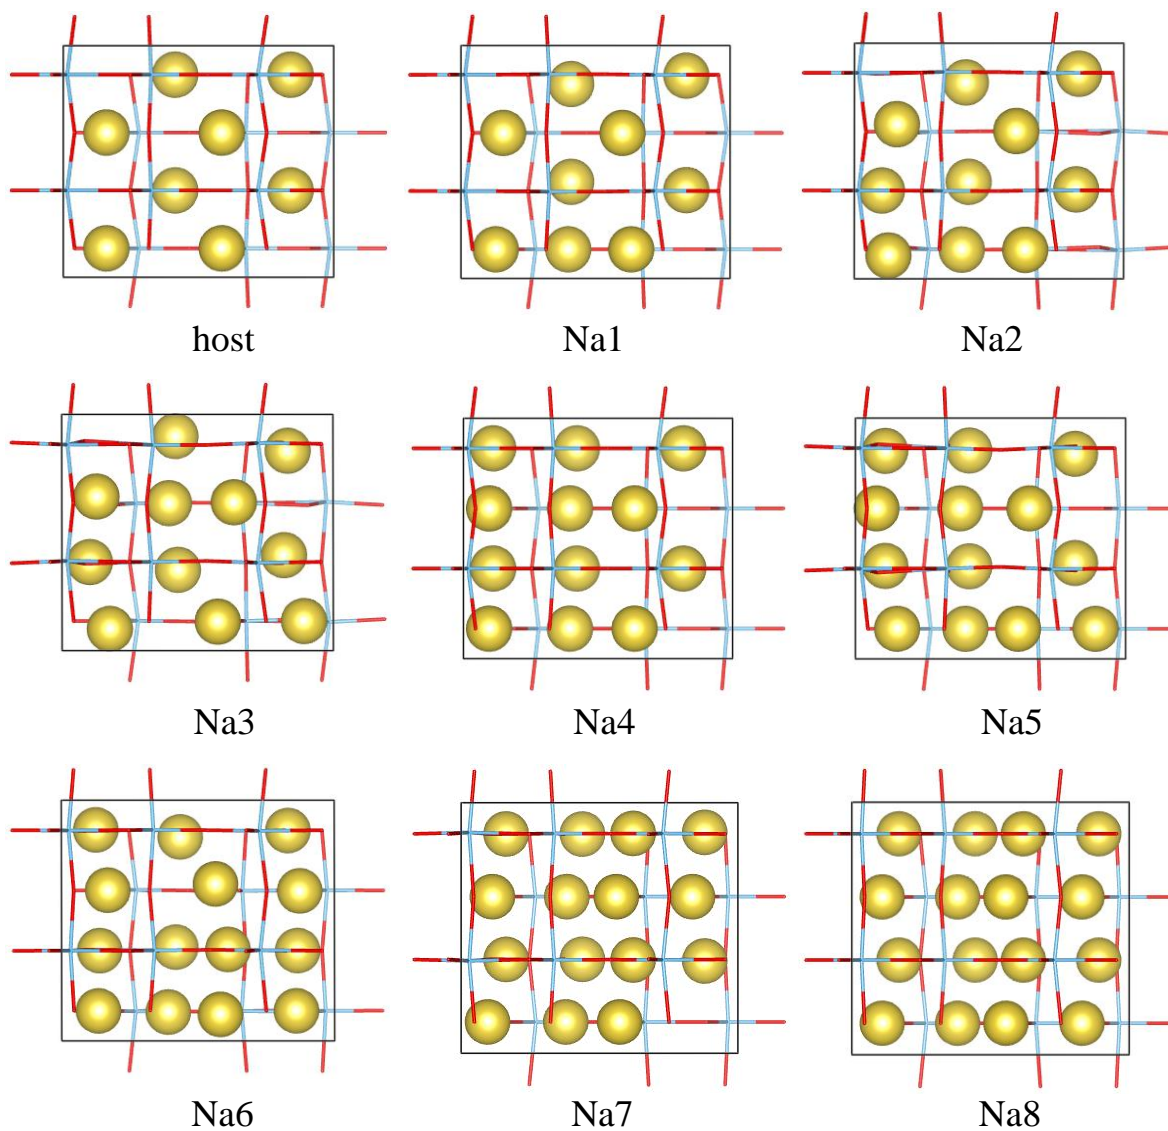

Figure S1. Top view of optimized structures for the lowest energy configuration for  $\text{Na}_{2+x}\text{Ti}_3\text{O}_7$  ( $x = 0, 0.25, 0.5, 0.75, 1, 1.25, 1.5, 1.75, 2$ ).

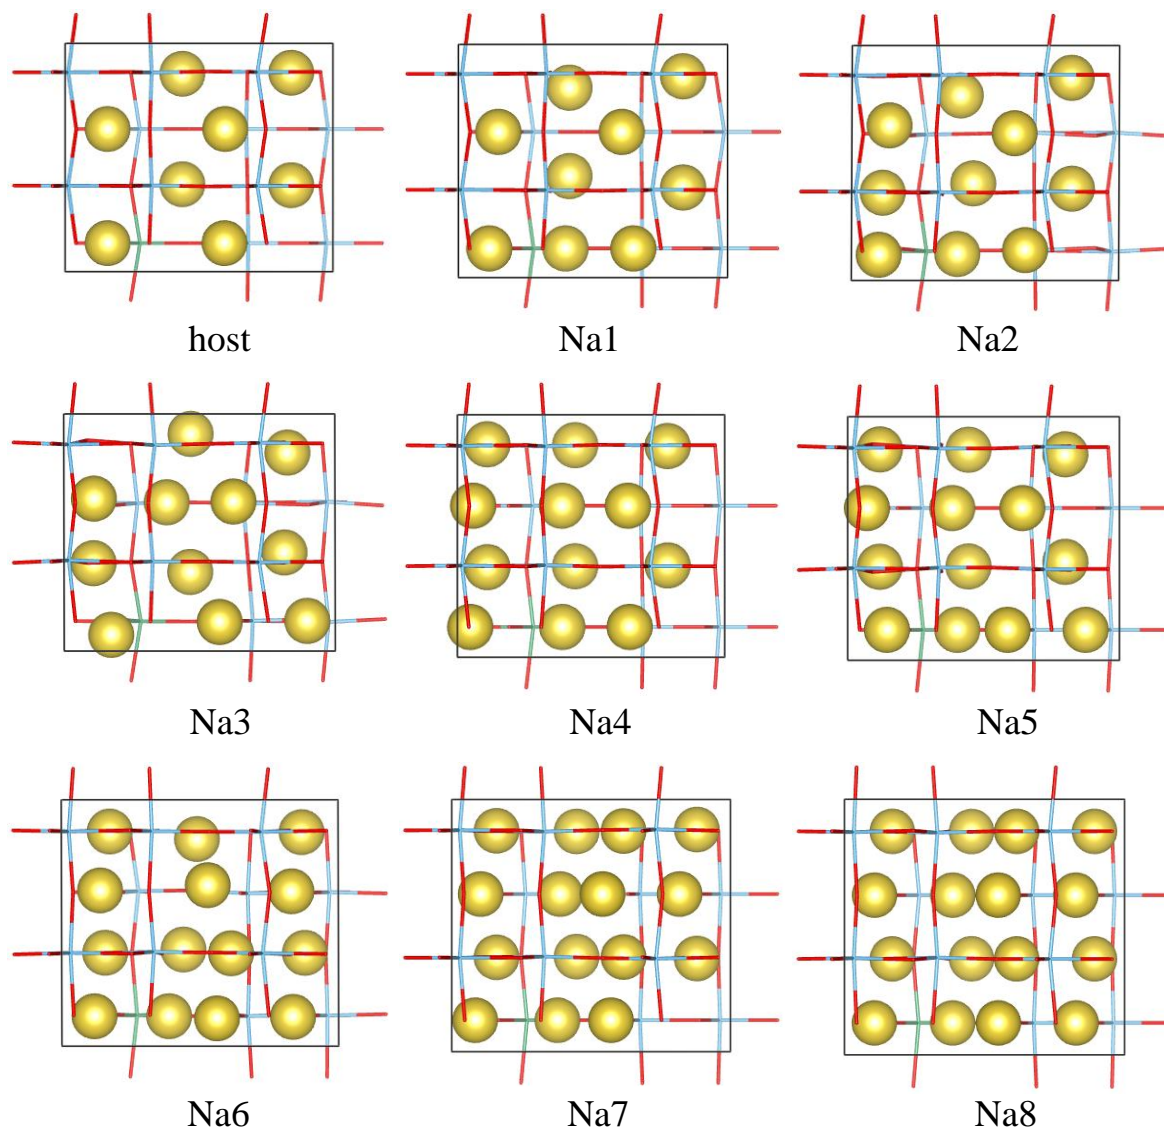

Figure S2. Top view of optimized structures for the lowest energy configuration for  $\text{Na}_{2+x}\text{Ti}_{2.75}\text{Nb}_{0.25}\text{O}_7$  ( $x = 0, 0.25, 0.5, 0.75, 1, 1.25, 1.5, 1.75, 2$ ).

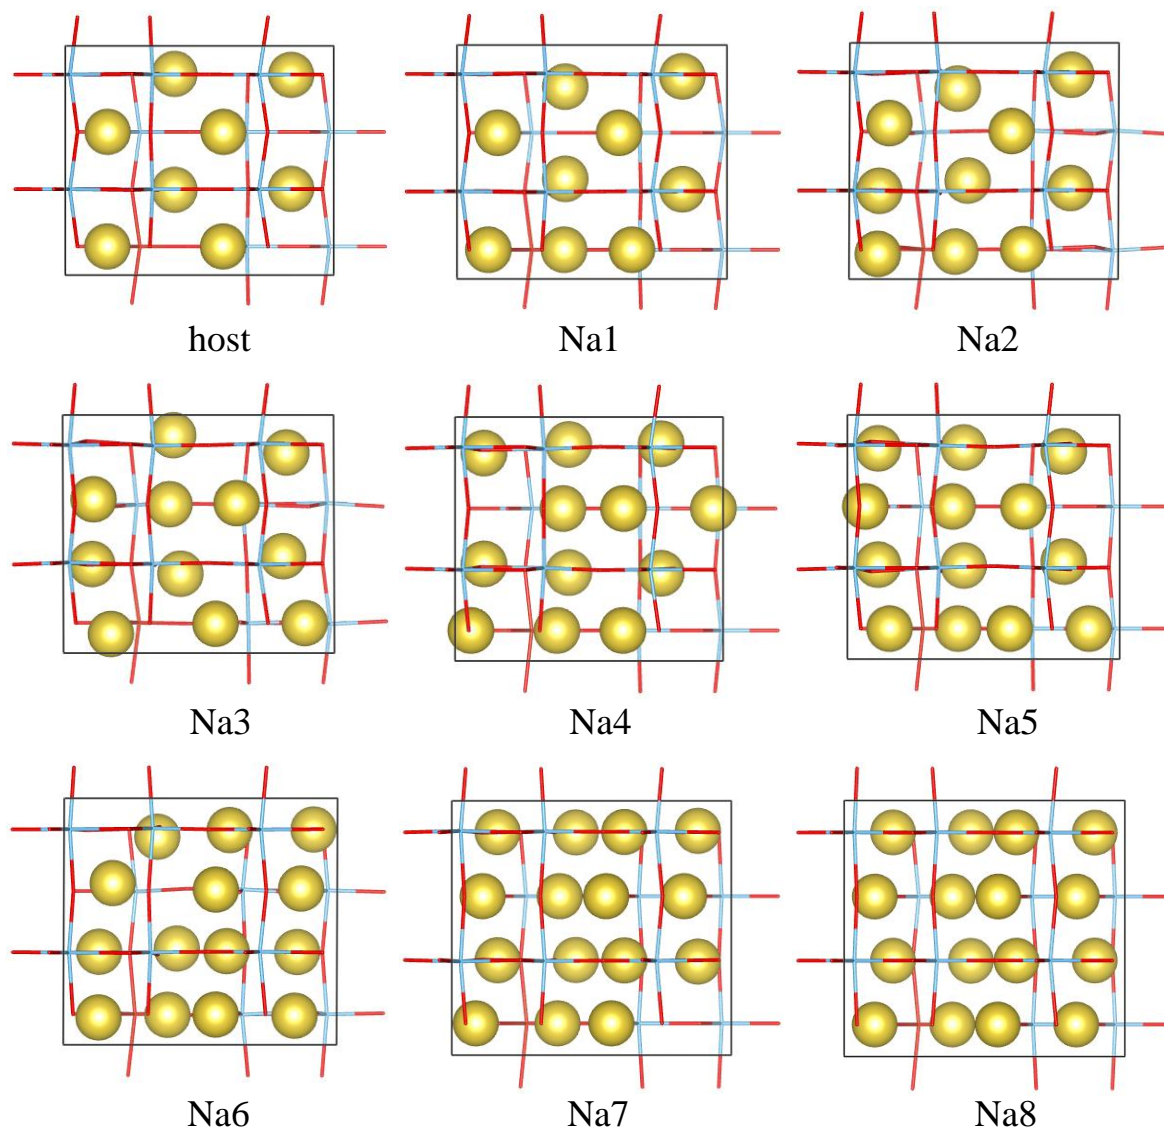

Figure S3. Top view of optimized structures for the lowest energy configuration for  $\text{Na}_{2+x}\text{Ti}_{2.75}\text{V}_{0.25}\text{O}_7$  ( $x = 0, 0.25, 0.5, 0.75, 1, 1.25, 1.5, 1.75, 2$ ).

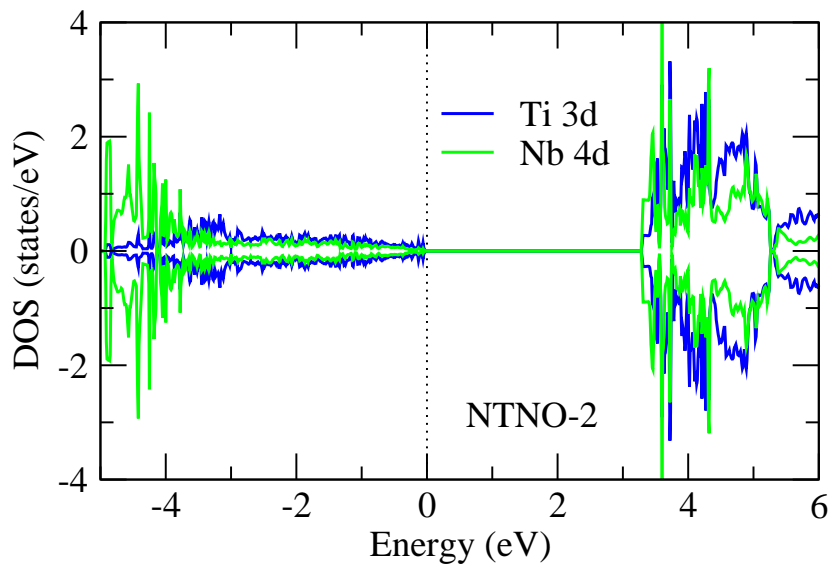

Figure S4. Orbital-resolved partial density of states for Ti 3d and Nb 4d in Na<sub>2</sub>Ti<sub>2.75</sub>Nb<sub>0.25</sub>O<sub>7</sub>.

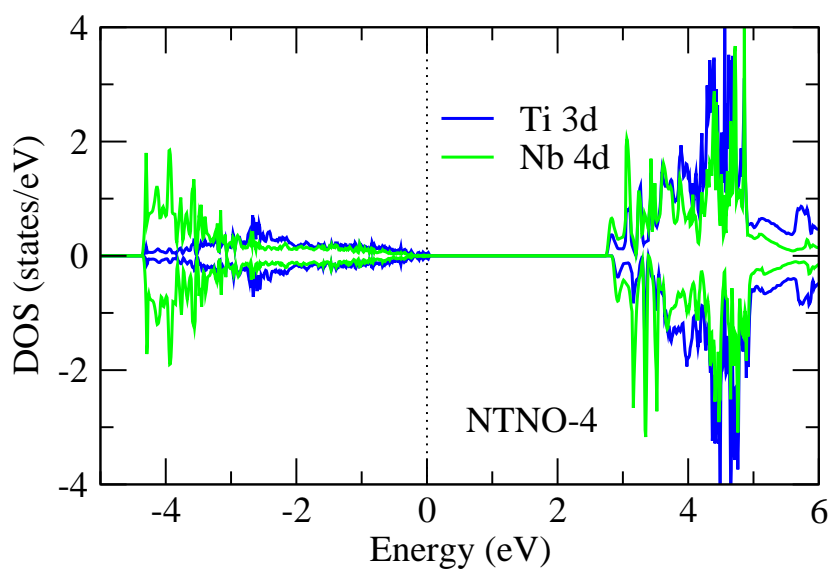

Figure S5. Orbital-resolved partial density of states for Ti 3d and Nb 4d in Na<sub>4</sub>Ti<sub>2.75</sub>Nb<sub>0.25</sub>O<sub>7</sub>.

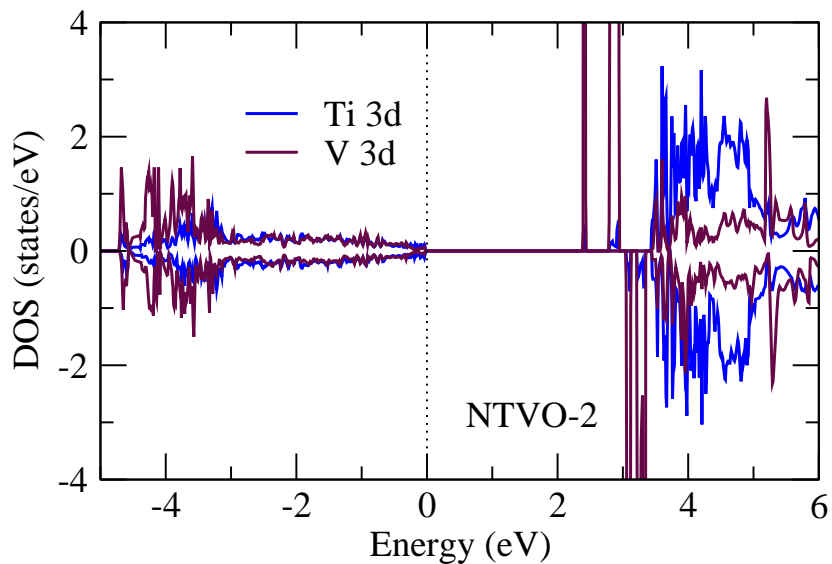

Figure S6. Orbital-resolved partial density of states for Ti 3d and V 3d in  $\text{Na}_2\text{Ti}_{2.75}\text{V}_{0.25}\text{O}_7$ .

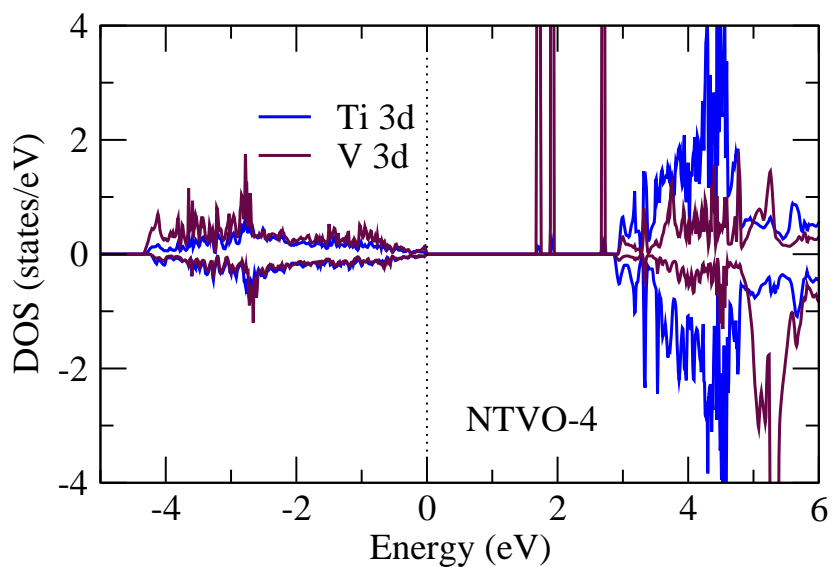

Figure S7. Orbital-resolved partial density of states for Ti 3d and V 3d in  $\text{Na}_4\text{Ti}_{2.75}\text{V}_{0.25}\text{O}_7$ .



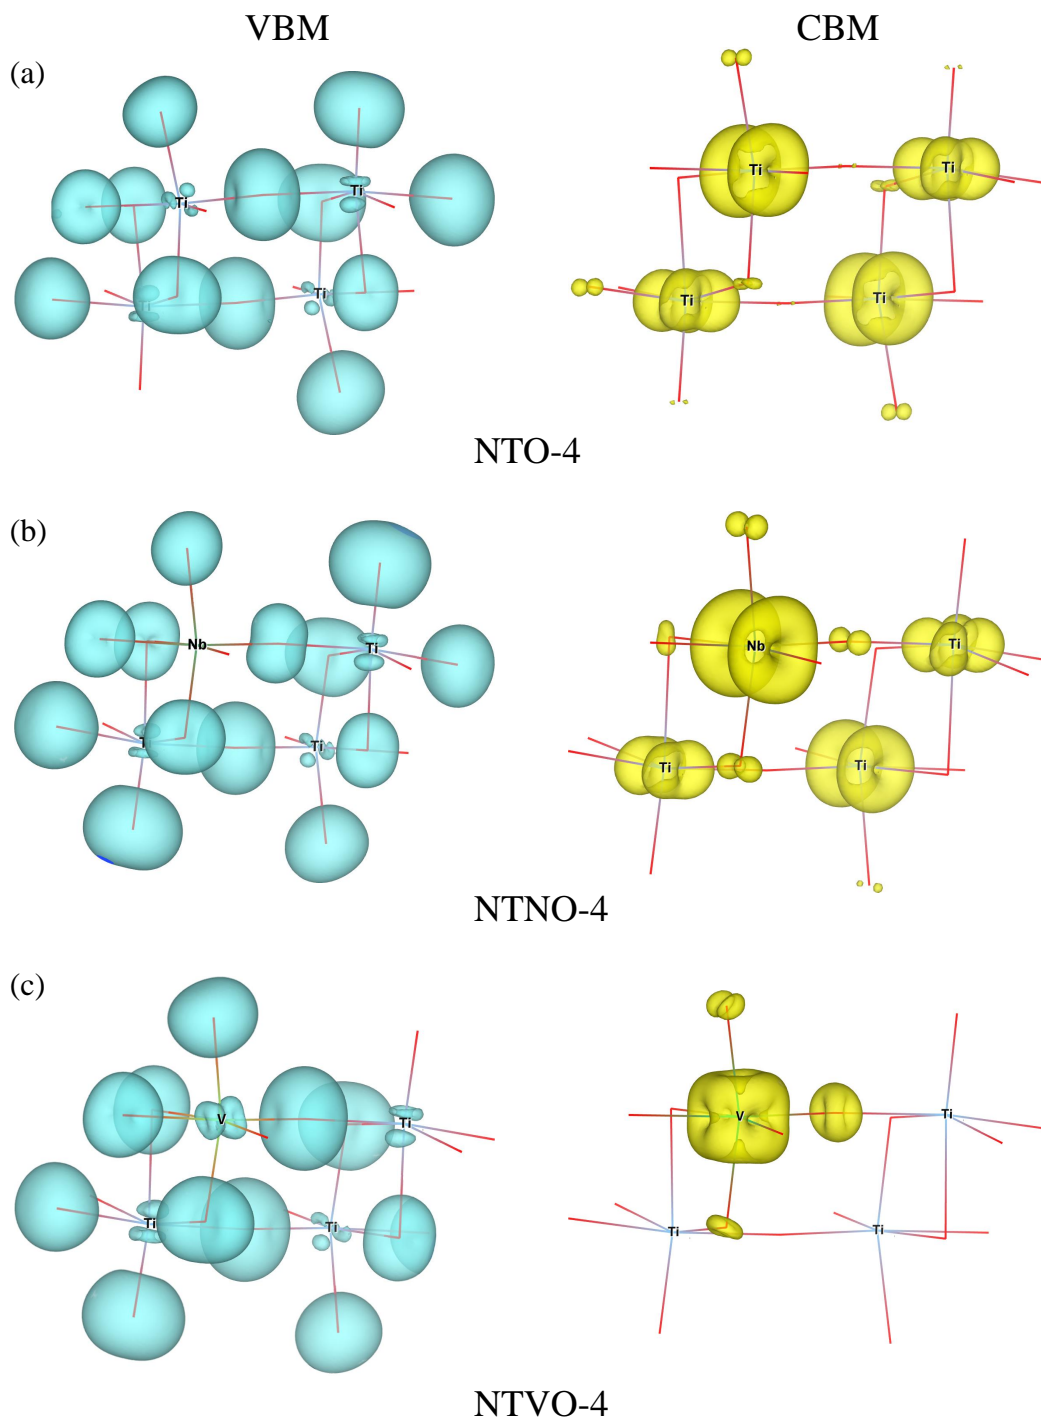

Figure S8. Isosurface plot for integrated local density of states with energies from valence band maximum (VBM) to VBM-1 eV (left panel), and from conduction band minimum (CBM) to CBM+1 eV (right panel) in  $\text{Na}_4\text{Ti}_3\text{O}_7$  (NTO-4),  $\text{Na}_4\text{Ti}_{2.75}\text{Nb}_{0.25}\text{O}_7$  (NTNO-4) and  $\text{Na}_4\text{Ti}_{2.75}\text{V}_{0.25}\text{O}_7$  (NTVO-4).
